# Supplementary material for: Plant Phenolics Inhibit Focal Adhesion Kinase and Suppress Host Cell Invasion by Uropathogenic Escherichia coli
Source: PubMed Central journal article supplement (PMC10690256; doi:10.1101/2023.11.23.568486), 2023-11-23
Supplement: NIHPP2023.11.23.568486v1-supplement-1.pdf [file NIHPP2023.11.23.568486v1-supplement-1.pdf]

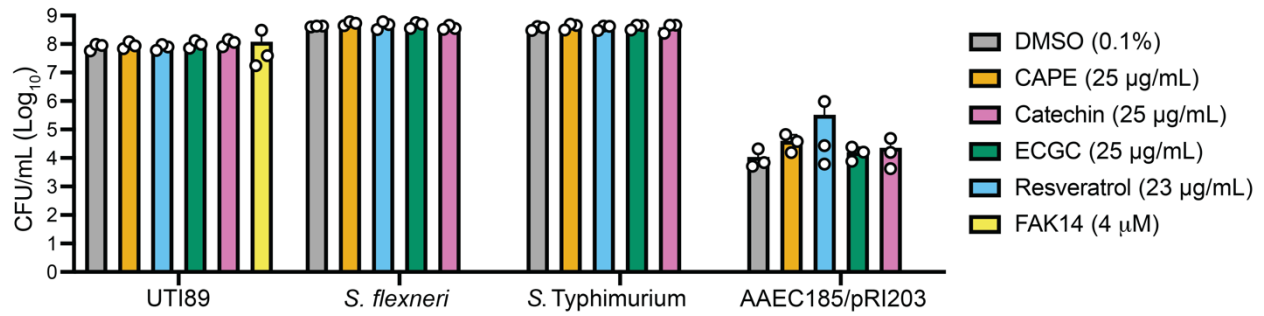

985 **Fig S1. Impact of the phenolic compounds and FAK14 on bacterial viability.**  
986 Bacteria were inoculated into 24-well plates containing complete RPMI medium ± the  
987 indicated drugs or DMSO (carrier alone), as described for the cell association and  
988 invasion assays but without host cells present. After 2-h incubations in a humidified CO<sub>2</sub>  
989 incubator at 37°C, bacterial titers were enumerated by plating serial dilutions. Bars  
990 indicate mean values from 3 independent assays (with SD).
